# Supplementary material for: Computerised decision to reduce inappropriate medication in the elderly: a systematic review with meta-analysis protocol
Source: PubMed Central journal article supplement — BMJ Open. 2018 Jan 30;8(1):e018988. doi: 10.1136/bmjopen-2017-018988 (PMC5829874; doi:10.1136/bmjopen-2017-018988), 2018-01-30
Supplement: bmjopen-2017-018988.draft_revisions.pdf [file bmjopen-2017-018988.draft_revisions.pdf]

# BMJ Open

BMJ Open is committed to open peer review. As part of this commitment we make the peer review history of every article we publish publicly available.

When an article is published we post the peer reviewers' comments and the authors' responses online. We also post the versions of the paper that were used during peer review. These are the versions that the peer review comments apply to.

The versions of the paper that follow are the versions that were submitted during the peer review process. They are not the versions of record or the final published versions. They should not be cited or distributed as the published version of this manuscript.

BMJ Open is an open access journal and the full, final, typeset and author-corrected version of record of the manuscript is available on our site with no access controls, subscription charges or pay-per-view fees (<http://bmjopen.bmj.com>).

If you have any questions on BMJ Open's open peer review process please email [editorial.bmjopen@bmj.com](mailto:editorial.bmjopen@bmj.com)

# BMJ Open

## Computerized decision to reduce inappropriate medication in the elderly: A systematic review with a meta-analysis protocol

|                               |                                                                                                                                                                                                                                                                                                                                                                                                                                                                                                                                                                                                                                                                                                                                                               |
|-------------------------------|---------------------------------------------------------------------------------------------------------------------------------------------------------------------------------------------------------------------------------------------------------------------------------------------------------------------------------------------------------------------------------------------------------------------------------------------------------------------------------------------------------------------------------------------------------------------------------------------------------------------------------------------------------------------------------------------------------------------------------------------------------------|
| Journal:                      | <i>BMJ Open</i>                                                                                                                                                                                                                                                                                                                                                                                                                                                                                                                                                                                                                                                                                                                                               |
| Manuscript ID                 | bmjopen-2017-018988                                                                                                                                                                                                                                                                                                                                                                                                                                                                                                                                                                                                                                                                                                                                           |
| Article Type:                 | Protocol                                                                                                                                                                                                                                                                                                                                                                                                                                                                                                                                                                                                                                                                                                                                                      |
| Date Submitted by the Author: | 07-Aug-2017                                                                                                                                                                                                                                                                                                                                                                                                                                                                                                                                                                                                                                                                                                                                                   |
| Complete List of Authors:     | Monteiro, Luís; Universidade da Beira Interior Faculdade de Ciências da Saúde; USF Esgueira +<br>Maricoto, Tiago; Universidade da Beira Interior Faculdade de Ciências da Saúde; USF Aveiro Aradas<br>Solha, Isabel; USF Terras de Souza<br>Monteiro-Soares, Matilde; Oporto University Faculty of Medicine, MEDCIDS – Department of Community Medicine, Information and Health Decision Sciences; Oporto University Faculty of Medicine, CINTESIS - Center for Health Technology and Services Research<br>Martins, Carlos; Oporto University Faculty of Medicine, CINTESIS - Center for Health Technology and Services Research; Oporto University Faculty of Medicine, MEDCIDS – Department of Community Medicine, Information and Health Decision Sciences |
| Keywords:                     | Medical Informatics Applications, Deprescriptions, Health informatics < BIOTECHNOLOGY & BIOINFORMATICS, GENERAL MEDICINE (see Internal Medicine), PRIMARY CARE                                                                                                                                                                                                                                                                                                                                                                                                                                                                                                                                                                                                |
|                               |                                                                                                                                                                                                                                                                                                                                                                                                                                                                                                                                                                                                                                                                                                                                                               |

SCHOLARONE™  
Manuscripts

**Title**

Computerized decision to reduce inappropriate medication in the elderly: A systematic review with a meta-analysis protocol

**Registration:** PROSPERO, nr. CRD42017067021.

**Authors:**

*Luis Monteiro, luismonteiro.net@gmail.com*

Faculdade de Ciências da Saúde, Universidade da Beira Interior, Covilhã, Portugal  
USF Esgueira +, Aveiro, Portugal

*Tiago Maricoto, tiago.maricoto@gmail.com*

Faculdade de Ciências da Saúde, Universidade da Beira Interior, Covilhã, Portugal  
USF Aveiro Aradas, Aveiro, Portugal

*Isabel Solha, isabel.solha@gmail.com*

USF Terras de Souza, Paredes, Portugal

*Matilde Monteiro-Soares, matsoares@med.up.pt*

MEDCIDS – *Department of Community Medicine, Information and Health Decision Sciences,*  
Oporto University Faculty of Medicine, Oporto, Portugal

CINTESIS - Center for Health Technology and Services Research, Oporto University  
Faculty of Medicine, Oporto, Portugal

*Carlos Martins, carlosmartins20@gmail.com*

MEDCIDS – Departamento de Medicina da Comunidade, Informação e Decisão em Saúde,  
Oporto University Faculty of Medicine, Oporto, Portugal

CINTESIS - Center for Health Technology and Services Research, Oporto University  
Faculty of Medicine, Oporto, Portugal

## 26 **Competing Interests Statement:**

27 All authors have completed the ICMJE uniform disclosure at  
28 [http://www.icmje.org/coi\\_disclosure.pdf](http://www.icmje.org/coi_disclosure.pdf) and declare: financial support for the submitted  
29 work from FEDER through POCI-01-0145-FEDER-007746, funded by the Programa  
30 Operacional Competitividade e Internacionalização – COMPETE2020 and by National  
31 Funds through FCT - Fundação para a Ciência e a Tecnologia within CINTESIS, R&D  
32 Unit (Reference UID/IC/4255/2013); MM-S work is financed by Project “NORTE-01-  
33 0145-FEDER-000016” (NanoSTIMA), financed by the North Portugal Regional  
34 Operational Programme.NORTE 2020, under the PORTUGAL 2020 Partnership  
35 Agreement, and the European Regional Development Fund (ERDF). No other relationships  
36 or activities that could appear to have influenced the submitted work

## 37 **Funding support:**

38  
39 This article was supported by FEDER through POCI-01-0145-FEDER-007746, funded by  
40 the Programa Operacional Competitividade e Internacionalização – COMPETE2020 and by  
41 National Funds through FCT - Fundação para a Ciência e a Tecnologia within CINTESIS,  
42 R&D Unit (Reference UID/IC/4255/2013).

43 Matilde Monteiro-Soares’ work is financed by Project “NORTE-01-0145-FEDER-000016”  
44 (NanoSTIMA), financed by the North Portugal Regional Operational Programme.NORTE  
45 2020, under the PORTUGAL 2020 Partnership Agreement, and the European Regional  
46 Development Fund (ERDF).

## 47 **Correspondence:**

48 Dr. Luís Monteiro; Email: [luismonteiro.net@gmail.com](mailto:luismonteiro.net@gmail.com); Postal Address: Av. Infante D.  
49 Henrique, 6200-506 Covilhã.

## 50 **Contributions:**

51 LM had the original idea for the systematic review. LM, TM, and ISS wrote the protocol  
52 and reviewed the search strategy. LM, TM, ISS, MM-S, and CM reviewed the protocol.

## Abstract

*Introduction:* Life expectancy continues to increase in developed countries. Elderly people are more likely to consume more medications and become vulnerable due to age-related changes in drugs' pharmacokinetics and pharmacodynamics. Recent studies have identified opportunities and barriers for deprescribing potentially inappropriate medications. Some computer decision support systems may improve prescribing, while improved software can reduce unnecessary prescription of tests; however, there is lack of evidence about their efficacy on deprescribing. We will systematically review the available literature to understand if computerized decision support is effective in the use of potentially inappropriate medications, thus having an impact on health outcomes.

*Methods and analysis:* A systematic review will be conducted using PubMed, CENTRAL, Web of Science and EMBASE databases, as well as the grey literature assessing the effectiveness of computer decision support interventions in deprescribing inappropriate medication, with an impact on health outcomes in the elderly. Two reviewers will conduct the articles 'screening, selection, and data extraction, independently and blind to each other. Eligible sources will be selected after discussing non-conformities. All extracted data from selected articles will be categorised based on the studies' participants, design and setting, methodological quality, bias and any other potential sources of heterogeneity. This review will be conducted and reported in adherence with the PRISMA statement of quality for reporting systematic reviews and meta-analyses.

*Ethics and Dissemination:* As a systematic review, this research is exempt from ethical approval. We intend to publish the full article in a related peer-reviewed journal and report on it at international conferences.

**Keywords:** Medical Informatics Applications, Deprescriptions.

**Registration:** PROSPERO, nr. CRD42017067021.

## 85 Introduction

86  
87 In developed countries, the aging population is increasing (1). Caring for older adults is a  
88 challenge for healthcare providers, because older patients are more likely to have  
89 multimorbidities (2, 3) and to consume more medication. Polypharmacy has a negative  
90 impact on senior health (4, 5) due to an increased risk of drug interactions and prescriptions  
91 for potentially inappropriate medications (6). Prescribing medication for elderly patients  
92 should be evidence-based; cautiousness is mandatory because seniors have changes in  
93 pharmacokinetics and pharmacodynamics, and research often excludes patients who are  
94 more than 65-years-old.

95 Deprescribing is defined as the “the process of withdrawal of inappropriate medication,  
96 supervised by a health care professional with the goal of managing polypharmacy and  
97 improving outcomes” (7).

98 In the community setting, primary care physicians/family doctors, nurses, pharmacists, and  
99 other professionals must manage the continuity of senior care. Recent studies have  
100 identified both opportunities and barriers for deprescribing.

101 Some computerized decision support systems may improve prescribing and software to  
102 reduce unnecessary tests (8), but there is lack of evidence regarding their efficacy on  
103 deprescribing. This systematic review aims to determine if computerized decision support  
104 is effective in eliminating potentially inappropriate prescriptions, and establish the efficacy  
105 of these interventions in the elderly in terms of health outcomes.

106

## 107 Methods and Analysis

108

### 109 *Eligibility criteria*

110 This systematic review will include interventional studies, such as experimental study  
111 designs [randomized controlled studies (RCTs), non-randomized controlled studies, and  
112 quasi-randomized controlled studies]. Observational studies (such as case reports, case  
113 series, cross-sectional analyses, case–controls, cohorts, etc.) will not be selected.

114 Only studies including participants aged 65 years and older, who were prescribed one or  
115 more regular medication, will be selected. On the other hand, studies including only

1  
2  
3 116 moribund, terminal, or palliative participants will be excluded. Studies published or in press  
4  
5 117 will be included independently of the language, year of publication, and setting in which it  
6  
7 118 was conducted (hospitals, nursing centres, communities, etc.).

8  
9 119

### 10 120 ***Information sources***

11  
12 121 Our sources of information will include electronic databases (namely PubMed, CENTRAL,  
13  
14 122 EMBASE), trial registries, different types of grey literature, and contact with specialists in  
15  
16 123 the field. If further data is needed, authors of the selected articles will be contacted.

17 124

### 18 19 125 ***Search strategy***

20  
21 126 Our initial search syntax in CENTRAL will be:

22 127 1 MeSH descriptor: [Medical Informatics Applications]explode all trees

23  
24 128 2.Computer decision support

25  
26 129 3.MeSH descriptor: [Deprescriptions]explode all trees

27  
28 130 4.MeSH descriptor: [Inappropriate Prescribing] explode all trees

29  
30 131 5.#1 or #2

31  
32 132 6.#3 or #4

33  
34 133 7.#5 and #6

35 134

36 135 For MEDLINE, the query will be "Medical Informatics Applications"[Mesh] AND  
37  
38 136 ("Deprescriptions"[Mesh] OR "Inappropriate Prescribing"[Mesh]); and for  
39  
40 137 EMBASE('medical informatics'/exp OR 'mobile application'/exp) AND  
41  
42 138 ('deprescription'/exp OR 'inappropriate prescribing'/exp).

43 139

### 44 45 140 ***Study selection process***

46  
47 141 Two authors will independently, and blinded to each other, perform the primary article  
48  
49 142 screening. First, they will review the title and abstract, and categorise the articles into three  
50  
51 143 groups: relevant, irrelevant, and unsure. Articles categorised as irrelevant by both reviewers  
52  
53 144 will be eliminated from the study. Then, each reviewer will review the full text of the  
54  
55 145 remaining articles and make a list of those to be included. The two lists will be compared

1  
2  
3 146 and non-conformities will be discussed. When an agreement cannot be reached, the whole  
4  
5 147 team of researchers will make the final decision.

6  
7 148

8  
9 149 ***Data management***

10 150 Once the articles to be included are selected, data will be extracted and entered into data  
11  
12 151 sheets independently by the two reviewers.

13 152 These two sheets, including their differences, will be checked by a third reviewer.

14 153 Any potential difference among reviewers will be discussed with the team, and if not  
15  
16 154 resolved, the manuscript authors will be contacted. Also, if required data are missing from  
17  
18 155 the article or are incomplete or unclear, inquiries will be sent to the authors.

19  
20  
21 156

22 157 ***Data items***

23  
24 158 The following information will be extracted from each article:1) study characteristics,  
25  
26 159 intervention type; type of study; country, setting, duration of follow-up;2) participants,  
27  
28 160 number, age;3) outcomes, effect of intervention on withdrawal of potentially inappropriate  
29  
30 161 medication, clinical outcomes such as mortality, any reported adverse drug withdrawal  
31  
32 162 effects, physical health, cognitive function, psychological health parameters, quality of life  
33  
34 163 measurement, and value.

35  
36 164

37 165 ***Risk of bias***

38 166 Two reviewers will assess, independently and blinded to each other, the risk of bias.

39 167 The Cochrane Collaboration Risk of Bias tool will be used to assess this for each study(9).

40  
41  
42 168

43 169 ***Data synthesis***

44  
45 170 The final report will present the range of clinical decision support, as well as efficiency  
46  
47 171 regarding health outcomes. If studies are sufficiently homogeneous in terms of design and  
48  
49 172 comparisons, we will conduct regression-analyses using a random-effects model.

50 173 Each outcome will be combined and calculated using the statistical software RevMan  
51  
52 174 5.1(10), according to statistical guidelines referenced in the current version of the Cochrane  
53  
54 175 Handbook for Systematic Reviews of Interventions(11). The Mantel-Haenszel method will  
55  
56 176 be used for the fixed effect model if tests for heterogeneity are not significant. If statistical



1  
2  
3 177 heterogeneity is observed ( $I^2 \geq 50\%$  or  $p < 0.1$ ), the random effects model will be chosen. If  
4  
5 178 heterogeneity is substantial, we will not perform a meta-analysis; a narrative, qualitative  
6  
7 179 summary will be done instead.

8  
9 180 Subgroups will be presented according to the setting, intervention and medication. The final  
10  
11 181 paper will be prepared following the Preferred Reporting Items for Systematic Reviews and  
12  
13 182 Meta-Analyses (PRISMA) guidelines(12, 13).

14 183 Subgroup analyses will be used to explore possible sources of heterogeneity, based on the  
15  
16 184 following: medications and type of software.

17 185 A systematic narrative synthesis will be provided in the text and tables to summarise and  
18  
19 186 explain the characteristics and findings of the studies; it will explore the relationship within  
20  
21 187 and between studies, in line with guidance from the Centre for Reviews and Dissemination.

22 188 In order to determine whether reporting bias is present, we will determine whether the  
23  
24 189 protocol of the RCT was published before recruitment of patients was initiated.

25 190 Data from RCTs will not be combined with data from other study designs. We will evaluate  
26  
27 191 whether selective reporting of outcomes is obvious. The quality of evidence for all  
28  
29 192 outcomes will be judged with the Grading of Recommendations Assessment, and the  
30  
31 193 Development and Evaluation working group methodology(14). We further separated  
32  
33 194 comparative studies with and without concurrent control groups. Forest plots will be  
34  
35 195 produced when three or more studies are included in a meta-analysis. Data in tables will be  
36  
37 196 presented by therapeutic class, based on the Anatomical Therapeutic Classification (ATC)  
38  
39 197 codes.

40 198

41 199 Randomized studies

42  
43 200 If heterogeneity is detected, we will select the random effects model. If one or more of the  
44  
45 201 original studies use a cluster-randomization method, we will use generic inverse variance.

46 202

47  
48 203 Dichotomous data

49  
50 204 Effect sizes and 95% confidence intervals (CIs) were expressed as odds ratios (OR). When a  
51  
52 205 study reports zero events in both arms, it would be excluded from the meta-analysis.

53 206  
54  
55  
56  
57  
58  
59  
60

207

## 208 Discussion

209

210 Although electronic health records are common in clinical practice, there is a lack of  
211 evidence of computer decision support regarding health outcomes. Deprescribing  
212 potentially inappropriate medication in the elderly is particularly difficult, although  
213 computer support may be an important tool. This systematic review will help identify the  
214 best decision support available, as well as its limitations. Therefore, this systematic review  
215 will be relevant for patients, health professionals, and policy makers.

## 216 References

217

- 218 1. OECD. Elderly population (indicator). doi: 10.1787/8d805ea1-en (Accessed on 26  
219 February 2017) [Available from: [https://data.oecd.org/pop/elderly-  
220 population.htm#indicator-chart](https://data.oecd.org/pop/elderly-population.htm#indicator-chart).
- 221 2. Marengoni A, Angleman S, Melis R, Mangialasche F, Karp A, Garmen A, et al.  
222 Aging with multimorbidity: a systematic review of the literature. *Ageing ResRev.*  
223 2011;10(4):430-9.
- 224 3. Prazeres F, Santiago L. Prevalence of multimorbidity in the adult population  
225 attending primary care in Portugal: a cross-sectional study. *BMJ open.* 2015;5(9):e009287.
- 226 4. Fried TR, O'Leary J, Towle V, Goldstein MK, Trentalange M, Martin DK. Health  
227 outcomes associated with polypharmacy in community-dwelling older adults: a systematic  
228 review. *JAm Ger Soc.* 2014;62(12):2261-72.
- 229 5. Lu WH, Wen YW, Chen LK, Hsiao FY. Effect of polypharmacy, potentially  
230 inappropriate medications and anticholinergic burden on clinical outcomes: a retrospective  
231 cohort study. *Can Med AssocJ.* 2015;187(4):E130-7.
- 232 6. Weng MC, Tsai CF, Sheu KL, Lee YT, Lee HC, Tzeng SL, et al. The impact of  
233 number of drugs prescribed on the risk of potentially inappropriate medication among  
234 outpatient older adults with chronic diseases. *J AssocPhysicians.* 2013;106(11):1009-15.
- 235 7. Reeve E, Ong M, Wu A, Jansen J, Petrovic M, Gnjjidic D. A systematic review of  
236 interventions to deprescribe benzodiazepines and other hypnotics among older people. *Eur*  
237 *J Clin Pharmacol.* 2017;doi:10.1007/s00228-017-2257-8.
- 238 .
- 239 8. Martins CMS, da Costa Teixeira AS, de Azevedo LFR, Sá LMB, Santos PAAP, do  
240 Couto MLGD, et al. The effect of a test ordering software intervention on the prescription  
241 of unnecessary laboratory tests - a randomized controlled trial. *BMC Med InformDecis.*  
242 2017;17(1):20.
- 243 9. Higgins JPT, Altman DG, Gøtzsche PC, Jüni P, Moher D, Oxman AD, et al. The  
244 Cochrane Collaboration's tool for assessing risk of bias in randomised trials. *Brit Med J.*  
245 2011;343.

- 1  
2  
3 246 10. Review Manager (RevMan) Copenhagen: The Nordic Cochrane Centre, The  
4 247 Cochrane Collaboration. Version 5.3 ed2014.  
5 248 11. Cochrane Handbook for Systematic Reviews of Interventions Version 5.1.0:  
6 249 updated March 2011.  
7  
8 250 12. Moher D, Shamseer L, Clarke M, Gherzi D, Liberati A, Petticrew M, et al. Preferred  
9 251 reporting items for systematic review and meta-analysis protocols (PRISMA-P) 2015  
10 252 statement. *Syst Rev.* 2015;4(1):1.  
11 253 13. Shamseer L, Moher D, Clarke M, Gherzi D, Liberati A, Petticrew M, et al. Preferred  
12 254 reporting items for systematic review and meta-analysis protocols (PRISMA-P) 2015:  
13 255 elaboration & explanation. *Brit Med J.* 2015;349.  
14 256 14. Alonso-Coello P, Schünemann HJ, Moberg J, Brignardello-Petersen R, Akl EA,  
15 257 Davoli M, et al. GRADE Evidence to Decision (EtD) frameworks: a systematic and  
16 258 transparent approach to making well informed healthcare choices. 1: Introduction. *Brit Med*  
17 259 *J.* 2016;353.  
18  
19 260  
20  
21  
22  
23  
24  
25  
26  
27  
28  
29  
30  
31  
32  
33  
34  
35  
36  
37  
38  
39  
40  
41  
42  
43  
44  
45  
46  
47  
48  
49  
50  
51  
52  
53  
54  
55  
56  
57  
58  
59  
60

## PRISMA-P 2015 Checklist

This checklist has been adapted for use with protocol submissions to *Systematic Reviews* from Table 3 in Moher D et al: Preferred reporting items for systematic review and meta-analysis protocols (PRISMA-P) 2015 statement. *Systematic Reviews* 2015 4:1

| Section/topic                     | #  | Checklist item                                                                                                                                                                                  | Information reported                |                                     | Line number(s) |
|-----------------------------------|----|-------------------------------------------------------------------------------------------------------------------------------------------------------------------------------------------------|-------------------------------------|-------------------------------------|----------------|
|                                   |    |                                                                                                                                                                                                 | Yes                                 | No                                  |                |
| <b>ADMINISTRATIVE INFORMATION</b> |    |                                                                                                                                                                                                 |                                     |                                     |                |
| <b>Title</b>                      |    |                                                                                                                                                                                                 |                                     |                                     |                |
| Identification                    | 1a | Identify the report as a protocol of a systematic review                                                                                                                                        | <input checked="" type="checkbox"/> | <input type="checkbox"/>            | 2,3            |
| Update                            | 1b | If the protocol is for an update of a previous systematic review, identify as such                                                                                                              | <input type="checkbox"/>            | <input checked="" type="checkbox"/> | N/A            |
| <b>Registration</b>               | 2  | If registered, provide the name of the registry (e.g., PROSPERO) and registration number in the Abstract                                                                                        | <input checked="" type="checkbox"/> | <input type="checkbox"/>            | 5; 81          |
| <b>Authors</b>                    |    |                                                                                                                                                                                                 |                                     |                                     |                |
| Contact                           | 3a | Provide name, institutional affiliation, and e-mail address of all protocol authors; provide physical mailing address of corresponding author                                                   | <input checked="" type="checkbox"/> | <input type="checkbox"/>            | 8-25           |
| Contributions                     | 3b | Describe contributions of protocol authors and identify the guarantor of the review                                                                                                             | <input checked="" type="checkbox"/> | <input type="checkbox"/>            | 50-52          |
| <b>Amendments</b>                 | 4  | If the protocol represents an amendment of a previously completed or published protocol, identify as such and list changes; otherwise, state plan for documenting important protocol amendments | <input type="checkbox"/>            | <input type="checkbox"/>            | N/A            |
| <b>Support</b>                    |    |                                                                                                                                                                                                 |                                     |                                     |                |
| Sources                           | 5a | Indicate sources of financial or other support for the review                                                                                                                                   | <input checked="" type="checkbox"/> | <input type="checkbox"/>            | 39-46          |
| Sponsor                           | 5b | Provide name for the review funder and/or sponsor                                                                                                                                               | <input checked="" type="checkbox"/> | <input type="checkbox"/>            | 39             |
| Role of sponsor/funder            | 5c | Describe roles of funder(s), sponsor(s), and/or institution(s), if any, in developing the protocol                                                                                              | <input type="checkbox"/>            | <input type="checkbox"/>            | N/A            |
| <b>INTRODUCTION</b>               |    |                                                                                                                                                                                                 |                                     |                                     |                |
| <b>Rationale</b>                  | 6  | Describe the rationale for the review in the context of what is already known                                                                                                                   | <input type="checkbox"/>            | <input type="checkbox"/>            | 87-103         |
| <b>Objectives</b>                 | 7  | Provide an explicit statement of the question(s) the review will address with reference to participants, interventions, comparators, and outcomes (PICO)                                        | <input type="checkbox"/>            | <input type="checkbox"/>            | 103-105        |
|                                   |    |                                                                                                                                                                                                 |                                     |                                     | 110-118        |

| Section/topic                             | #   | Checklist item                                                                                                                                                                                                                              | Information reported                |                          | Line number(s) |
|-------------------------------------------|-----|---------------------------------------------------------------------------------------------------------------------------------------------------------------------------------------------------------------------------------------------|-------------------------------------|--------------------------|----------------|
|                                           |     |                                                                                                                                                                                                                                             | Yes                                 | No                       |                |
| <b>METHODS</b>                            |     |                                                                                                                                                                                                                                             |                                     |                          |                |
| <b>Eligibility criteria</b>               | 8   | Specify the study characteristics (e.g., PICO, study design, setting, time frame) and report characteristics (e.g., years considered, language, publication status) to be used as criteria for eligibility for the review                   | <input checked="" type="checkbox"/> | <input type="checkbox"/> | 114-118        |
| <b>Information sources</b>                | 9   | Describe all intended information sources (e.g., electronic databases, contact with study authors, trial registers, or other grey literature sources) with planned dates of coverage                                                        | <input type="checkbox"/>            | <input type="checkbox"/> | 121-123        |
| <b>Search strategy</b>                    | 10  | Present draft of search strategy to be used for at least one electronic database, including planned limits, such that it could be repeated                                                                                                  | <input type="checkbox"/>            | <input type="checkbox"/> | 121-123        |
| <b>STUDY RECORDS</b>                      |     |                                                                                                                                                                                                                                             |                                     |                          |                |
| Data management                           | 11a | Describe the mechanism(s) that will be used to manage records and data throughout the review                                                                                                                                                | <input type="checkbox"/>            | <input type="checkbox"/> | 150-155        |
| Selection process                         | 11b | State the process that will be used for selecting studies (e.g., two independent reviewers) through each phase of the review (i.e., screening, eligibility, and inclusion in meta-analysis)                                                 | <input type="checkbox"/>            | <input type="checkbox"/> | 150-155        |
| Data collection process                   | 11c | Describe planned method of extracting data from reports (e.g., piloting forms, done independently, in duplicate), any processes for obtaining and confirming data from investigators                                                        | <input type="checkbox"/>            | <input type="checkbox"/> | 150-155        |
| <b>Data items</b>                         | 12  | List and define all variables for which data will be sought (e.g., PICO items, funding sources), any pre-planned data assumptions and simplifications                                                                                       | <input type="checkbox"/>            | <input type="checkbox"/> | 150-155        |
| <b>Outcomes and prioritization</b>        | 13  | List and define all outcomes for which data will be sought, including prioritization of main and additional outcomes, with rationale                                                                                                        | <input type="checkbox"/>            | <input type="checkbox"/> | 149-152        |
| <b>Risk of bias in individual studies</b> | 14  | Describe anticipated methods for assessing risk of bias of individual studies, including whether this will be done at the outcome or study level, or both; state how this information will be used in data synthesis                        | <input type="checkbox"/>            | <input type="checkbox"/> | 166-167        |
| <b>DATA</b>                               |     |                                                                                                                                                                                                                                             |                                     |                          |                |
| <b>Synthesis</b>                          | 15a | Describe criteria under which study data will be quantitatively synthesized                                                                                                                                                                 | <input type="checkbox"/>            | <input type="checkbox"/> | 170-197        |
|                                           | 15b | If data are appropriate for quantitative synthesis, describe planned summary measures, methods of handling data, and methods of combining data from studies, including any planned exploration of consistency (e.g., $I^2$ , Kendall's tau) | <input type="checkbox"/>            | <input type="checkbox"/> | 175            |
|                                           | 15c | Describe any proposed additional analyses (e.g., sensitivity or subgroup analyses, meta-regression)                                                                                                                                         | <input type="checkbox"/>            | <input type="checkbox"/> | 172            |
|                                           | 15d | If quantitative synthesis is not appropriate, describe the type of summary planned                                                                                                                                                          | <input type="checkbox"/>            | <input type="checkbox"/> | 182            |

| Section/topic                            | #  | Checklist item                                                                                                              | Information reported     |                          | Line number(s) |
|------------------------------------------|----|-----------------------------------------------------------------------------------------------------------------------------|--------------------------|--------------------------|----------------|
|                                          |    |                                                                                                                             | Yes                      | No                       |                |
| <b>Meta-bias(es)</b>                     | 16 | Specify any planned assessment of meta-bias(es) (e.g., publication bias across studies, selective reporting within studies) | <input type="checkbox"/> | <input type="checkbox"/> | 172            |
| <b>Confidence in cumulative evidence</b> | 17 | Describe how the strength of the body of evidence will be assessed (e.g., GRADE)                                            | <input type="checkbox"/> | <input type="checkbox"/> | 192            |

For peer review only

# BMJ Open

## Computerized decision to reduce inappropriate medication in the elderly: A systematic review with a meta-analysis protocol

|                                 |                                                                                                                                                                                                                                                                                                                                                                                                                                                                                                                                                                                                                                                                                                                                                               |
|---------------------------------|---------------------------------------------------------------------------------------------------------------------------------------------------------------------------------------------------------------------------------------------------------------------------------------------------------------------------------------------------------------------------------------------------------------------------------------------------------------------------------------------------------------------------------------------------------------------------------------------------------------------------------------------------------------------------------------------------------------------------------------------------------------|
| Journal:                        | <i>BMJ Open</i>                                                                                                                                                                                                                                                                                                                                                                                                                                                                                                                                                                                                                                                                                                                                               |
| Manuscript ID                   | bmjopen-2017-018988.R1                                                                                                                                                                                                                                                                                                                                                                                                                                                                                                                                                                                                                                                                                                                                        |
| Article Type:                   | Protocol                                                                                                                                                                                                                                                                                                                                                                                                                                                                                                                                                                                                                                                                                                                                                      |
| Date Submitted by the Author:   | 10-Oct-2017                                                                                                                                                                                                                                                                                                                                                                                                                                                                                                                                                                                                                                                                                                                                                   |
| Complete List of Authors:       | Monteiro, Luís; Universidade da Beira Interior Faculdade de Ciências da Saúde; USF Esgueira +<br>Maricoto, Tiago; Universidade da Beira Interior Faculdade de Ciências da Saúde; USF Aveiro Aradas<br>Solha, Isabel; USF Terras de Souza<br>Monteiro-Soares, Matilde; Oporto University Faculty of Medicine, MEDCIDS – Department of Community Medicine, Information and Health Decision Sciences; Oporto University Faculty of Medicine, CINTESIS - Center for Health Technology and Services Research<br>Martins, Carlos; Oporto University Faculty of Medicine, CINTESIS - Center for Health Technology and Services Research; Oporto University Faculty of Medicine, MEDCIDS – Department of Community Medicine, Information and Health Decision Sciences |
| <b>Primary Subject Heading</b>: | General practice / Family practice                                                                                                                                                                                                                                                                                                                                                                                                                                                                                                                                                                                                                                                                                                                            |
| Secondary Subject Heading:      | Health informatics, Patient-centred medicine, Geriatric medicine                                                                                                                                                                                                                                                                                                                                                                                                                                                                                                                                                                                                                                                                                              |
| Keywords:                       | Medical Informatics Applications, Deprescriptions, Health informatics < BIOTECHNOLOGY & BIOINFORMATICS, GENERAL MEDICINE (see Internal Medicine), PRIMARY CARE                                                                                                                                                                                                                                                                                                                                                                                                                                                                                                                                                                                                |
|                                 |                                                                                                                                                                                                                                                                                                                                                                                                                                                                                                                                                                                                                                                                                                                                                               |

SCHOLARONE™  
Manuscripts

**Title**

Computerized decision to reduce inappropriate medication in the elderly: A systematic review with a meta-analysis protocol

**Registration:** PROSPERO, nr. CRD42017067021.

**Authors:**

*Luis Monteiro, luismonteiro.net@gmail.com*

Faculdade de Ciências da Saúde, Universidade da Beira Interior, Covilhã, Portugal  
USF Esgueira +, Aveiro, Portugal

*Tiago Maricoto, tiago.maricoto@gmail.com*

Faculdade de Ciências da Saúde, Universidade da Beira Interior, Covilhã, Portugal  
USF Aveiro Aradas, Aveiro, Portugal

*Isabel Solha, isabel.solha@gmail.com*

USF Terras de Souza, Paredes, Portugal

*Matilde Monteiro-Soares, matsoares@med.up.pt*

MEDCIDS – *Department of Community Medicine, Information and Health Decision Sciences,*  
Oporto University Faculty of Medicine, Oporto, Portugal

CINTESIS - Center for Health Technology and Services Research, Oporto University  
Faculty of Medicine, Oporto, Portugal

*Carlos Martins, carlosmartins20@gmail.com*

MEDCIDS – Departamento de Medicina da Comunidade, Informação e Decisão em Saúde,  
Oporto University Faculty of Medicine, Oporto, Portugal

CINTESIS - Center for Health Technology and Services Research, Oporto University  
Faculty of Medicine, Oporto, Portugal



## 26 **Competing Interests Statement:**

27 All authors completed the ICMJE uniform disclosure at  
28 [http://www.icmje.org/coi\\_disclosure.pdf](http://www.icmje.org/coi_disclosure.pdf) and declare financial support for the submitted  
29 work from FEDER through POCI-01-0145-FEDER-007746, funded by the Programa  
30 Operacional Competitividade e Internacionalização – COMPETE2020 and by National  
31 Funds through FCT - Fundação para a Ciência e a Tecnologia within CINTESIS, R&D  
32 Unit (Reference UID/IC/4255/2013); MM-S work is financed by Project “NORTE-01-  
33 0145-FEDER-000016” (NanoSTIMA), financed by the North Portugal Regional  
34 Operational Programme.NORTE 2020, under the PORTUGAL 2020 Partnership  
35 Agreement, and the European Regional Development Fund (ERDF). There are no other  
36 relationships or activities that could appear to have influenced the submitted work

## 37 **Funding support:**

38  
39 This article was supported by FEDER through POCI-01-0145-FEDER-007746, funded by  
40 the Programa Operacional Competitividade e Internacionalização – COMPETE2020 and by  
41 National Funds through FCT - Fundação para a Ciência e a Tecnologia within CINTESIS,  
42 R&D Unit (Reference UID/IC/4255/2013).

43 Matilde Monteiro-Soares’ work is financed by Project “NORTE-01-0145-FEDER-000016”  
44 (NanoSTIMA), financed by the North Portugal Regional Operational Programme. NORTE  
45 2020, under the PORTUGAL 2020 Partnership Agreement, and the European Regional  
46 Development Fund (ERDF).

## 47 **Correspondence:**

48 Dr. Luís Monteiro; Email: [luismonteiro.net@gmail.com](mailto:luismonteiro.net@gmail.com); Postal Address: Av. Infante D.  
49 Henrique, 6200-506 Covilhã.

## 50 **Contributions:**

51 LM had the original idea for the systematic review. LM, TM, and ISS wrote the protocol  
52 and reviewed the search strategy. LM, TM, ISS, MM-S, and CM reviewed the protocol.

## Abstract

*Introduction:* Life expectancy continues to increase in developed countries. Elderly people are more likely to consume more medications and become vulnerable to age-related changes in drugs' pharmacokinetics and pharmacodynamics. Recent studies have identified opportunities and barriers for deprescribing potentially inappropriate medications. It is already been demonstrated that computerized decision support systems can reduce physician orders for unnecessary tests. We will systematically review the available literature to understand if computerized decision support is effective in the use of potentially inappropriate medications, thus having an impact on health outcomes.

*Methods and analysis:* A systematic review will be conducted using MEDLINE, CENTRAL, and EMBASE databases, as well as the grey literature assessing the effectiveness of computer decision support interventions in deprescribing inappropriate medication, with an impact on health outcomes in the elderly. The search will be performed during January and February 2018. Two reviewers will conduct the articles 'screening, selection, and data extraction, independently and blind to each other.' Eligible sources will be selected after discussing non-conformities. All extracted data from selected articles will be categorised based on the studies' participants, design and setting, methodological quality, bias and any other potential sources of heterogeneity. This review will be conducted and reported in adherence with the PRISMA statement of quality for reporting systematic reviews and meta-analyses.

*Ethics and Dissemination:* As a systematic review, this research is exempt from ethical approval. We intend to publish the full article in a related peer-reviewed journal and report on it at international conferences.

**Keywords:** Medical informatics applications, deprescriptions, potentially inappropriate medicines.

**Registration:** PROSPERO, nr. CRD42017067021.

**Strengths and limitations of this study**

- 1  
2  
3 85 • This study will include the first meta-analysis on this clinical topic.  
4  
5 86 • This protocol was written following the recently published PRISMA-P guidelines.  
6  
7 87 • We aim to clarify whether newer technologies, such as computerized decisions, help  
8  
9 88 to improve clinical outcomes.  
10  
11 89 • Studies with high heterogeneity and varying quality may limit the quality of  
12  
13 90 evidence for this systematic review.

## 91 **Introduction**

92  
93 In developed countries, the aging population is increasing (1). Caring for older adults is a  
94 challenge for healthcare providers, as older patients are more likely to have  
95 multimorbidities (2, 3) and to consume more medication (4). Polypharmacy has a negative  
96 impact on senior health (5, 6) due to an increased risk of drug interactions and prescriptions  
97 for potentially inappropriate medications (4). Prescribing medication for elderly patients  
98 should be evidence-based; cautiousness is mandatory, since seniors have changes in  
99 pharmacokinetics and pharmacodynamics, and research often excludes patients who are  
100 more than 65-years-old (7).

101 Deprescribing is defined as the “the process of withdrawal of inappropriate medication,  
102 supervised by a health care professional with the goal of managing polypharmacy and  
103 improving outcomes” (8).

104 In the community setting, primary care physicians/family doctors, nurses, pharmacists, and  
105 other professionals must manage the continuity of senior care. Recent studies have  
106 identified that interventions such as pharmaceutical care appear beneficial in reducing  
107 inappropriate prescribing (9). Although family doctors want to learn more through mobile  
108 technologies (10), the doctors’ perspective is that there is insufficient emphasis on geriatric  
109 pharmacotherapy training (11)

110 It has already been shown that computerized decision support systems can reduce  
111 physicians’ orders of unnecessary tests (12). This systematic review aims to determine if  
112 computerized decision support is effective in reducing potentially inappropriate medicines.  
113 This should better establish the efficacy of these interventions in the elderly in terms of  
114 health outcomes.

1  
2  
3 115 Other studies have addressed this issue(9, 13). Our study will include a meta-analysis,  
4  
5 116 which has not previously been done.  
6

## 7 117 **Methods and Analysis**

### 8 118 9 119 *Eligibility criteria*

10  
11 119 *Eligibility criteria*  
12 120 This systematic review will include interventional studies, such as experimental study  
13  
14 121 designs [randomized controlled studies (RCTs), non-randomized controlled studies, and  
15  
16 122 quasi-randomized controlled studies]. Observational studies (such as case reports, case  
17  
18 123 series, cross-sectional analyses, case–controls, and cohorts, etc.) will not be selected. We  
19  
20 124 will include trials in the general population and studies with older adults with particular  
21  
22 125 diseases.

23 126 Only studies including participants aged 65 years and older, who were prescribed one or  
24  
25 127 more regular medications, will be selected. On the other hand, studies including only  
26  
27 128 moribund, terminal, or palliative participants will be excluded. Studies published or in press  
28  
29 129 will be included independently of the language, year of publication, and setting in which it  
30  
31 130 was conducted (hospitals, nursing centres, communities, etc.). Potentially inappropriate  
32  
33 131 medications will be defined using the Beers Criteria (14) and STOPP/START Criteria (15)  
34

### 35 133 *Information sources*

36 134 Our sources of information will include electronic databases (namely MEDLINE,  
37  
38 135 CENTRAL, EMBASE, ISI Web of science), trial registries, different types of grey  
39  
40 136 literature, and contact with specialists in the field. If further data is needed, authors of the  
41  
42 137 selected articles will be contacted. The search will be performed in January and February  
43  
44 138 2018. The search will have no language restrictions. We will first contact the authors to  
45  
46 139 ascertain if the main data are available in other languages and seek to translate whenever  
47  
48 140 necessary. A second search, using all identified keywords and proprietary names of  
49  
50 141 computerized decision support systems will then be undertaken across all included  
51  
52 142 databases.

### 53 143 *Search strategy*

54 144 Our initial search syntax in CENTRAL will be:

55  
56 145 1 MeSH descriptor: [Medical Informatics Applications]explode all trees  
57

- 1  
2  
3 146 2.Computer decision support  
4  
5 147 3.MeSH descriptor: [Deprescriptions]explode all trees  
6  
7 148 4.MeSH descriptor: [Inappropriate Prescribing] explode all trees  
8  
9 149 5.#1 or #2  
10  
11 150 6.#3 or #4  
12  
13 151 7.#5 and #6  
14

15 153 For MEDLINE, the query will be "Medical Informatics Applications"[Mesh] AND  
16 154 ("Deprescriptions"[Mesh] OR "Inappropriate Prescribing"[Mesh]) "decision support  
17 155 systems, clinical"[MeSH Terms] OR clinical decision support systems [Text Word] /  
18 156 "decision making, computer-assisted"[MeSH Terms] OR computer assisted decision  
19 157 making[Text Word] / "medical order entry systems"[MeSH Terms] / "medication  
20 158 errors"[MeSH Terms]; and for EMBASE ('medical informatics'/exp OR 'mobile  
21 159 application'/exp) AND ('deprescription'/exp OR 'inappropriate prescribing'/exp).  
22  
23 160 Reference lists will be checked to identify additional relevant studies in the systematic  
24 161 review. For ISI Web of science the query will be "Medical Informatics  
25 162 Applications"[Mesh] AND ("Deprescriptions"[Mesh] OR "Inappropriate  
26 163 Prescribing"[Mesh]) "decision support systems, clinical"[MeSH Terms] OR clinical  
27 164 decision support systems[Text Word] /  
28 165 "decision making, computer-assisted"[MeSH Terms] OR computer assisted decision  
29 166 making [Text Word] / "medical order entry systems"[MeSH Terms] / "medication  
30 167 errors"[MeSH Terms]."  
31  
32 168

### 34 169 ***Study selection process***

35  
36 170 Two authors will independently, and blinded to each other, perform the primary article  
37  
38 171 screening. First, they will review the title and abstract, and categorise the articles into three  
39 172 groups: relevant, irrelevant, and unsure. Articles categorised as irrelevant by both reviewers  
40  
41 173 will be eliminated from the study. Then, each reviewer will review the full text of the  
42  
43 174 remaining articles and make a list of those to be included. The two lists will be compared  
44  
45 175 and non-conformities will be discussed. When an agreement cannot be reached, the whole  
46 176 team of researchers will come to the final decision.  
47

48 177

### 50 178 ***Data management***

51 179 Once the articles to be included are selected, data will be extracted and entered into data  
52  
53 180 sheets independently by two reviewers. These two sheets, including their differences, will  
54  
55 181 be checked by a third reviewer. These sheets will also include the study reference,  
56  
57  
58  
59

182 intervention type, study design, country, setting, follow-up, number of participants, age,  
183 effect of intervention on reducing potential inappropriate medications, and clinical  
184 outcomes.

185 Any potential difference among reviewers will be discussed with the team, and if not  
186 resolved, the manuscript authors will be contacted. Also, if required data are missing from  
187 the article or are incomplete or unclear, inquiries will similarly be sent to the authors.

188

#### 189 ***Data items***

190 The following information will be extracted from each article: 1) study characteristics,  
191 intervention type; type of study; country, setting, duration of follow-up; 2) participants,  
192 number, age; 3) outcomes: The primary outcome is effect of intervention on withdrawal of  
193 potentially inappropriate medications (discontinuation rate). The authors will give priority  
194 to the following outcomes, by order of importance: mortality, hospitalization, any reported  
195 adverse drug withdrawal effects, and quality of life measurements.

196

#### 197 ***Risk of bias***

198 Two reviewers will assess, independently and blinded to each other, the risk of bias.  
199 The Cochrane Collaboration Risk of Bias tool will be used to assess this for each study  
200 (16).

201

#### 202 ***Data synthesis***

203 The final report will present the available data of the computer decision to support or  
204 reduce inappropriate medications in older adults.  
205 Each outcome will be combined and calculated using the statistical software RevMan 5.1  
206 (17), according to statistical guidelines referenced in the current version of the Cochrane  
207 Handbook for Systematic Reviews of Interventions(18). If heterogeneity is substantial, we  
208 will not perform a meta-analysis; thus, a narrative, qualitative summary will be done  
209 instead.

210 Subgroups will be presented according to the setting, intervention, and medication. The  
211 final paper will be prepared following the Preferred Reporting Items for Systematic  
212 Reviews and Meta-Analyses (PRISMA) guidelines (19, 20).

213 Subgroup analyses will be used to explore possible sources of heterogeneity, based on the  
214 following: medications and type of software.

215 Regarding subgroups, we assume it will be relevant to include subgroups regarding the tool  
216 used by software to identify targets: STOPP/START criteria subgroup and the Beers  
217 criteria. Subgroup. We will also conduct meta-regression to evaluate whether the covariates  
218 have significant influence on heterogeneity.

219 The studies rated as having a high risk of bias will be included and then analysed in a sub-  
220 group analysis. They will be included for the discussion topic.

221 A systematic narrative synthesis will be provided in the text and tables to summarise and  
222 explain the characteristics and findings of the studies; it will explore the relationship within  
223 and between studies, in line with guidance from the Centre for Reviews and Dissemination.

224 In order to determine whether reporting bias is present, we will include funnel plot and  
225 statistical tests in the assessment. We will determine whether the protocol of the RCT was  
226 published before recruitment of patients was initiated.

227 Data from RCTs will not be combined with data from other study designs. We will evaluate  
228 whether selective reporting of outcomes is obvious. The quality of evidence for all  
229 outcomes will be judged with the Grading of Recommendations Assessment, and the  
230 Development and Evaluation working group methodology (21). We further separated  
231 comparative studies with and without concurrent control groups. Forest plots will be  
232 produced when three or more studies are included in a meta-analysis. Data in tables will be  
233 presented by therapeutic class, based on the Anatomical Therapeutic Classification (ATC)  
234 codes.

235 Randomized studies:

236 If heterogeneity is detected, we will select the random effects model.

237 Dichotomous data:

238 Effect sizes and 95% confidence intervals (CIs) were expressed as odds ratios (OR). When a  
239 study reports zero events in both arms, we will consider using zero-cell correction methods.

240  
241

## 242 Ethics and Dissemination

243 As a systematic review, this research is exempt from ethical approval. We intend to publish  
244 the full article in a related peer-reviewed journal and report on it at international  
245 conferences.

## 246 Discussion

247  
248 Although electronic health records are common in clinical practice, there is a lack of  
249 evidence of computer decision support regarding health outcomes. Deprescribing  
250 potentially inappropriate medication in the elderly is particularly difficult, although  
251 computer support may be an important tool. This systematic review will help identify the  
252 success of computerized decision support to reduce inappropriate medication. Therefore,  
253 this review will be relevant for patients, health professionals, and policy makers. One  
254 potential limitation of this study will be if we find a limited number of studies with clinical  
255 outcomes measured.

## 256 References

- 257  
258 1. OECD. Elderly population (indicator). doi: 10.1787/8d805ea1-en (Accessed on 26  
259 February 2017) [Available from: [https://data.oecd.org/pop/elderly-  
260 population.htm#indicator-chart](https://data.oecd.org/pop/elderly-population.htm#indicator-chart).  
261 2. Marengoni A, Angleman S, Melis R, Mangialasche F, Karp A, Garmen A, et al.  
262 Aging with multimorbidity: a systematic review of the literature. *Ageing research reviews*.  
263 2011;10(4):430-9.  
264 3. Prazeres F, Santiago L. Prevalence of multimorbidity in the adult population  
265 attending primary care in Portugal: a cross-sectional study. *BMJ open*. 2015;5(9):e009287.  
266 4. Weng MC, Tsai CF, Sheu KL, Lee YT, Lee HC, Tzeng SL, et al. The impact of  
267 number of drugs prescribed on the risk of potentially inappropriate medication among  
268 outpatient older adults with chronic diseases. *QJM : monthly journal of the Association of  
269 Physicians*. 2013;106(11):1009-15.  
270 5. Fried TR, O'Leary J, Towle V, Goldstein MK, Trentalange M, Martin DK. Health  
271 outcomes associated with polypharmacy in community-dwelling older adults: a systematic  
272 review. *Journal of the American Geriatrics Society*. 2014;62(12):2261-72.  
273 6. Lu WH, Wen YW, Chen LK, Hsiao FY. Effect of polypharmacy, potentially  
274 inappropriate medications and anticholinergic burden on clinical outcomes: a retrospective  
275 cohort study. *CMAJ : Canadian Medical Association journal = journal de l'Association  
276 medicale canadienne*. 2015;187(4):E130-7.  
277 7. Van Spall HG, Toren A, Kiss A, Fowler RA. Eligibility criteria of randomized  
278 controlled trials published in high-impact general medical journals: a systematic sampling  
279 review. *Jama*. 2007;297(11):1233-40.



- 1  
2  
3 280 8. Reeve E, D. Gnjidic, J. Long, and S. Hilmer. A systematic review of the emerging  
4 281 definition of "deprescribing" with network analysis: Implications for future research and  
5 282 clinical practice. *British journal of clinical pharmacology*. 2015(2015a. 80(6)):1254–68  
6 283  
7  
8 284 9. Patterson SM, Cadogan CA, Kerse N, Cardwell CR, Bradley MC, Ryan C.  
9 285 Interventions to improve the appropriate use of polypharmacy for older people. *Cochrane*  
10 286 *Database Syst Rev*. 2014;10.  
11 287 10. survey PCISoW. PCI Survey: Family doctors want education on a smartphone2017.  
12 288 Available from:  
13 289 [https://www.dropbox.com/s/4vy5o2kdhz7ji8z/WONCA%20survey%20summary%20ACv2](https://www.dropbox.com/s/4vy5o2kdhz7ji8z/WONCA%20survey%20summary%20ACv2.pdf?dl=0)  
14 290 [.pdf?dl=0](https://www.dropbox.com/s/4vy5o2kdhz7ji8z/WONCA%20survey%20summary%20ACv2.pdf?dl=0).  
15  
16 291 11. Cullinan S, Fleming A, O'Mahony D, Ryan C, O'Sullivan D, Gallagher P, et al.  
17 292 Doctors' perspectives on the barriers to appropriate prescribing in older hospitalized  
18 293 patients: a qualitative study. *British journal of clinical pharmacology*. 2014;79(5):860-9.  
19 294 12. Martins CMS, da Costa Teixeira AS, de Azevedo LFR, Sá LMB, Santos PAAP, do  
20 295 Couto MLGD, et al. The effect of a test ordering software intervention on the prescription  
21 296 of unnecessary laboratory tests - a randomized controlled trial. *BMC Medical Informatics*  
22 297 *and Decision Making*. 2017;17(1):20.  
23  
24 298 13. Clyne B, Fitzgerald C, Quinlan A, Hardy C, Galvin R, Fahey T, et al. Interventions  
25 299 to Address Potentially Inappropriate Prescribing in Community-Dwelling Older Adults: A  
26 300 Systematic Review of Randomized Controlled Trials. *Journal of the American Geriatrics*  
27 301 *Society*. 2016;64(6):1210-22.  
28 302 14. American Geriatrics Society 2015 Updated Beers Criteria for Potentially  
29 303 Inappropriate Medication Use in Older Adults. *Journal of the American Geriatrics Society*.  
30 304 2015;63(11):2227-46.  
31  
32 305 15. O'Mahony D, O'Sullivan D, Byrne S, O'Connor MN, Ryan C, Gallagher P.  
33 306 STOPP/START criteria for potentially inappropriate prescribing in older people: version 2.  
34 307 *Age and ageing*. 2014;44(2):213-8.  
35 308 16. Higgins JPT, Altman DG, Gøtzsche PC, Jüni P, Moher D, Oxman AD, et al. The  
36 309 Cochrane Collaboration's tool for assessing risk of bias in randomised trials. *BMJ*.  
37 310 2011;343.  
38  
39 311 17. Review Manager (RevMan) Copenhagen: The Nordic Cochrane Centre, The  
40 312 Cochrane Collaboration. Version 5.3 ed2014.  
41 313 18. Cochrane Handbook for Systematic Reviews of Interventions Version 5.1.0:  
42 314 updated March 20112011.  
43 315 19. Moher D, Shamseer L, Clarke M, Ghersi D, Liberati A, Petticrew M, et al. Preferred  
44 316 reporting items for systematic review and meta-analysis protocols (PRISMA-P) 2015  
45 317 statement. *Systematic Reviews*. 2015;4(1):1.  
46  
47 318 20. Shamseer L, Moher D, Clarke M, Ghersi D, Liberati A, Petticrew M, et al. Preferred  
48 319 reporting items for systematic review and meta-analysis protocols (PRISMA-P) 2015:  
49 320 elaboration & explanation. *BMJ*. 2015;349.  
50 321 21. Alonso-Coello P, Schünemann HJ, Moher J, Brignardello-Petersen R, Akl EA,  
51 322 Davoli M, et al. GRADE Evidence to Decision (EtD) frameworks: a systematic and  
52 323 transparent approach to making well informed healthcare choices. 1: Introduction. *BMJ*.  
53 324 2016;353.  
54  
55 325

## PRISMA-P 2015 Checklist

This checklist has been adapted for use with protocol submissions to *Systematic Reviews* from Table 3 in Moher D et al: Preferred reporting items for systematic review and meta-analysis protocols (PRISMA-P) 2015 statement. *Systematic Reviews* 2015 4:1

| Section/topic                     | #  | Checklist item                                                                                                                                                                                  | Information reported                |                                     | Line number(s)     |
|-----------------------------------|----|-------------------------------------------------------------------------------------------------------------------------------------------------------------------------------------------------|-------------------------------------|-------------------------------------|--------------------|
|                                   |    |                                                                                                                                                                                                 | Yes                                 | No                                  |                    |
| <b>ADMINISTRATIVE INFORMATION</b> |    |                                                                                                                                                                                                 |                                     |                                     |                    |
| <b>Title</b>                      |    |                                                                                                                                                                                                 |                                     |                                     |                    |
| Identification                    | 1a | Identify the report as a protocol of a systematic review                                                                                                                                        | <input checked="" type="checkbox"/> | <input type="checkbox"/>            | 2,3                |
| Update                            | 1b | If the protocol is for an update of a previous systematic review, identify as such                                                                                                              | <input type="checkbox"/>            | <input checked="" type="checkbox"/> | N/A                |
| <b>Registration</b>               | 2  | If registered, provide the name of the registry (e.g., PROSPERO) and registration number in the Abstract                                                                                        | <input checked="" type="checkbox"/> | <input type="checkbox"/>            | 5; 81              |
| <b>Authors</b>                    |    |                                                                                                                                                                                                 |                                     |                                     |                    |
| Contact                           | 3a | Provide name, institutional affiliation, and e-mail address of all protocol authors; provide physical mailing address of corresponding author                                                   | <input checked="" type="checkbox"/> | <input type="checkbox"/>            | 8-25               |
| Contributions                     | 3b | Describe contributions of protocol authors and identify the guarantor of the review                                                                                                             | <input checked="" type="checkbox"/> | <input type="checkbox"/>            | 50-52              |
| <b>Amendments</b>                 | 4  | If the protocol represents an amendment of a previously completed or published protocol, identify as such and list changes; otherwise, state plan for documenting important protocol amendments | <input type="checkbox"/>            | <input checked="" type="checkbox"/> | N/A                |
| <b>Support</b>                    |    |                                                                                                                                                                                                 |                                     |                                     |                    |
| Sources                           | 5a | Indicate sources of financial or other support for the review                                                                                                                                   | <input checked="" type="checkbox"/> | <input type="checkbox"/>            | 39-46              |
| Sponsor                           | 5b | Provide name for the review funder and/or sponsor                                                                                                                                               | <input checked="" type="checkbox"/> | <input type="checkbox"/>            | 39                 |
| Role of sponsor/funder            | 5c | Describe roles of funder(s), sponsor(s), and/or institution(s), if any, in developing the protocol                                                                                              | <input type="checkbox"/>            | <input checked="" type="checkbox"/> | N/A                |
| <b>INTRODUCTION</b>               |    |                                                                                                                                                                                                 |                                     |                                     |                    |
| <b>Rationale</b>                  | 6  | Describe the rationale for the review in the context of what is already known                                                                                                                   | <input checked="" type="checkbox"/> | <input type="checkbox"/>            | 92-113             |
| <b>Objectives</b>                 | 7  | Provide an explicit statement of the question(s) the review will address with reference to participants, interventions, comparators, and outcomes (PICO)                                        | <input checked="" type="checkbox"/> | <input type="checkbox"/>            | 117-127<br>187-188 |

| Section/topic                             | #   | Checklist item                                                                                                                                                                                                                              | Information reported                |                          | Line number(s)     |
|-------------------------------------------|-----|---------------------------------------------------------------------------------------------------------------------------------------------------------------------------------------------------------------------------------------------|-------------------------------------|--------------------------|--------------------|
|                                           |     |                                                                                                                                                                                                                                             | Yes                                 | No                       |                    |
| <b>METHODS</b>                            |     |                                                                                                                                                                                                                                             |                                     |                          |                    |
| <b>Eligibility criteria</b>               | 8   | Specify the study characteristics (e.g., PICO, study design, setting, time frame) and report characteristics (e.g., years considered, language, publication status) to be used as criteria for eligibility for the review                   | <input checked="" type="checkbox"/> | <input type="checkbox"/> | 124-127            |
| <b>Information sources</b>                | 9   | Describe all intended information sources (e.g., electronic databases, contact with study authors, trial registers, or other grey literature sources) with planned dates of coverage                                                        | <input checked="" type="checkbox"/> | <input type="checkbox"/> | 138-161            |
| <b>Search strategy</b>                    | 10  | Present draft of search strategy to be used for at least one electronic database, including planned limits, such that it could be repeated                                                                                                  | <input checked="" type="checkbox"/> | <input type="checkbox"/> | 138-161            |
| <b>STUDY RECORDS</b>                      |     |                                                                                                                                                                                                                                             |                                     |                          |                    |
| Data management                           | 11a | Describe the mechanism(s) that will be used to manage records and data throughout the review                                                                                                                                                | <input checked="" type="checkbox"/> | <input type="checkbox"/> | 172-180            |
| Selection process                         | 11b | State the process that will be used for selecting studies (e.g., two independent reviewers) through each phase of the review (i.e., screening, eligibility, and inclusion in meta-analysis)                                                 | <input checked="" type="checkbox"/> | <input type="checkbox"/> | 163-170            |
| Data collection process                   | 11c | Describe planned method of extracting data from reports (e.g., piloting forms, done independently, in duplicate), any processes for obtaining and confirming data from investigators                                                        | <input checked="" type="checkbox"/> | <input type="checkbox"/> | 191-192            |
| <b>Data items</b>                         | 12  | List and define all variables for which data will be sought (e.g., PICO items, funding sources), any pre-planned data assumptions and simplifications                                                                                       | <input checked="" type="checkbox"/> | <input type="checkbox"/> | 183-188            |
| <b>Outcomes and prioritization</b>        | 13  | List and define all outcomes for which data will be sought, including prioritization of main and additional outcomes, with rationale                                                                                                        | <input checked="" type="checkbox"/> | <input type="checkbox"/> | 186-188            |
| <b>Risk of bias in individual studies</b> | 14  | Describe anticipated methods for assessing risk of bias of individual studies, including whether this will be done at the outcome or study level, or both; state how this information will be used in data synthesis                        | <input checked="" type="checkbox"/> | <input type="checkbox"/> | 191-192<br>210-211 |
| <b>DATA</b>                               |     |                                                                                                                                                                                                                                             |                                     |                          |                    |
| <b>Synthesis</b>                          | 15a | Describe criteria under which study data will be quantitatively synthesized                                                                                                                                                                 | <input checked="" type="checkbox"/> | <input type="checkbox"/> | 195-229            |
|                                           | 15b | If data are appropriate for quantitative synthesis, describe planned summary measures, methods of handling data, and methods of combining data from studies, including any planned exploration of consistency (e.g., $I^2$ , Kendall's tau) | <input checked="" type="checkbox"/> | <input type="checkbox"/> | 195-229<br>199-200 |
|                                           | 15c | Describe any proposed additional analyses (e.g., sensitivity or subgroup analyses, meta-regression)                                                                                                                                         | <input checked="" type="checkbox"/> | <input type="checkbox"/> | 204-205<br>208-209 |

1  
2  
3  
4  
5  
6  
7  
8  
9  
10  
11  
12  
13  
14  
15  
16  
17  
18  
19  
20  
21  
22  
23  
24  
25  
26  
27  
28  
29  
30  
31  
32  
33  
34  
35  
36  
37  
38  
39  
40  
41  
42  
43  
44  
45  
46

| Section/topic                            | #   | Checklist item                                                                                                              | Information reported                |                          | Line number(s) |
|------------------------------------------|-----|-----------------------------------------------------------------------------------------------------------------------------|-------------------------------------|--------------------------|----------------|
|                                          |     |                                                                                                                             | Yes                                 | No                       |                |
|                                          | 15d | If quantitative synthesis is not appropriate, describe the type of summary planned                                          | <input checked="" type="checkbox"/> | <input type="checkbox"/> | 212-214        |
| <b>Meta-bias(es)</b>                     | 16  | Specify any planned assessment of meta-bias(es) (e.g., publication bias across studies, selective reporting within studies) | <input checked="" type="checkbox"/> | <input type="checkbox"/> | 215-216        |
| <b>Confidence in cumulative evidence</b> | 17  | Describe how the strength of the body of evidence will be assessed (e.g., GRADE)                                            | <input checked="" type="checkbox"/> | <input type="checkbox"/> | 219-221        |

For peer review only

# BMJ Open

## Computerized decision to reduce inappropriate medication in the elderly: A systematic review with a meta-analysis protocol

|                                 |                                                                                                                                                                                                                                                                                                                                                                                                                                                                                                                                                                                                                                                                                                                                                               |
|---------------------------------|---------------------------------------------------------------------------------------------------------------------------------------------------------------------------------------------------------------------------------------------------------------------------------------------------------------------------------------------------------------------------------------------------------------------------------------------------------------------------------------------------------------------------------------------------------------------------------------------------------------------------------------------------------------------------------------------------------------------------------------------------------------|
| Journal:                        | <i>BMJ Open</i>                                                                                                                                                                                                                                                                                                                                                                                                                                                                                                                                                                                                                                                                                                                                               |
| Manuscript ID                   | bmjopen-2017-018988.R2                                                                                                                                                                                                                                                                                                                                                                                                                                                                                                                                                                                                                                                                                                                                        |
| Article Type:                   | Protocol                                                                                                                                                                                                                                                                                                                                                                                                                                                                                                                                                                                                                                                                                                                                                      |
| Date Submitted by the Author:   | 29-Nov-2017                                                                                                                                                                                                                                                                                                                                                                                                                                                                                                                                                                                                                                                                                                                                                   |
| Complete List of Authors:       | Monteiro, Luís; Universidade da Beira Interior Faculdade de Ciências da Saúde; USF Esgueira +<br>Maricoto, Tiago; Universidade da Beira Interior Faculdade de Ciências da Saúde; USF Aveiro Aradas<br>Solha, Isabel; USF Terras de Souza<br>Monteiro-Soares, Matilde; Oporto University Faculty of Medicine, MEDCIDS – Department of Community Medicine, Information and Health Decision Sciences; Oporto University Faculty of Medicine, CINTESIS - Center for Health Technology and Services Research<br>Martins, Carlos; Oporto University Faculty of Medicine, CINTESIS - Center for Health Technology and Services Research; Oporto University Faculty of Medicine, MEDCIDS – Department of Community Medicine, Information and Health Decision Sciences |
| <b>Primary Subject Heading</b>: | General practice / Family practice                                                                                                                                                                                                                                                                                                                                                                                                                                                                                                                                                                                                                                                                                                                            |
| Secondary Subject Heading:      | Health informatics, Patient-centred medicine, Geriatric medicine                                                                                                                                                                                                                                                                                                                                                                                                                                                                                                                                                                                                                                                                                              |
| Keywords:                       | Medical Informatics Applications, Deprescriptions, Health informatics < BIOTECHNOLOGY & BIOINFORMATICS, GENERAL MEDICINE (see Internal Medicine), PRIMARY CARE                                                                                                                                                                                                                                                                                                                                                                                                                                                                                                                                                                                                |
|                                 |                                                                                                                                                                                                                                                                                                                                                                                                                                                                                                                                                                                                                                                                                                                                                               |

SCHOLARONE™  
Manuscripts

**Title**

Computerized decision to reduce inappropriate medication in the elderly: A systematic review with meta-analysis protocol

**Registration:** PROSPERO, nr. CRD42017067021.

**Authors:**

*Lúis Monteiro, luismonteiro.net@gmail.com*

Faculdade de Ciências da Saúde, Universidade da Beira Interior, Covilhã, Portugal  
USF Esgueira +, Aveiro, Portugal

*Tiago Maricoto, tiago.maricoto@gmail.com*

Faculdade de Ciências da Saúde, Universidade da Beira Interior, Covilhã, Portugal  
USF Aveiro Aradas, Aveiro, Portugal

*Isabel Solha, isabel.solha@gmail.com*

USF Terras de Souza, Paredes, Portugal

*Matilde Monteiro-Soares, matsoares@med.up.pt*

MEDCIDS – Department of Community Medicine, Information and Health Decision Sciences,  
Oporto University Faculty of Medicine, Oporto, Portugal

CINTESIS - Center for Health Technology and Services Research, Oporto University  
Faculty of Medicine, Oporto, Portugal

*Carlos Martins, carlosmartins20@gmail.com*

MEDCIDS – Departamento de Medicina da Comunidade, Informação e Decisão em Saúde,  
Oporto University Faculty of Medicine, Oporto, Portugal

CINTESIS - Center for Health Technology and Services Research, Oporto University  
Faculty of Medicine, Oporto, Portugal

**Competing Interests Statement:**

All authors completed the ICMJE uniform disclosure at [http://www.icmje.org/coi\\_disclosure.pdf](http://www.icmje.org/coi_disclosure.pdf) and declare financial support for the submitted work from FEDER through POCI-01-0145-FEDER-007746, funded by the Programa Operacional Competitividade e Internacionalização – COMPETE2020 and by National

1  
2  
3 31 Funds through FCT - Fundação para a Ciência e a Tecnologia within CINTESIS, R&D  
4  
5 32 Unit (Reference UID/IC/4255/2013); MM-S work is financed by Project “NORTE-01-  
6  
7 33 0145-FEDER-000016” (NanoSTIMA), financed by the North Portugal Regional  
8  
9 34 Operational Programme.NORTE 2020, under the PORTUGAL 2020 Partnership  
10  
11 35 Agreement, and the European Regional Development Fund (ERDF). There are no other  
12  
13 36 relationships or activities that could appear to have influenced the submitted work  
14  
15 37

### 38 **Funding support:**

16 38  
17 39  
18 40 This article was supported by FEDER through POCI-01-0145-FEDER-007746, funded by  
19  
20 41 the Programa Operacional Competitividade e Internacionalização – COMPETE2020 and by  
21  
22 42 National Funds through FCT - Fundação para a Ciência e a Tecnologia within CINTESIS,  
23  
24 43 R&D Unit (Reference UID/IC/4255/2013).

25 44 Matilde Monteiro-Soares’ work is financed by Project “NORTE-01-0145-FEDER-000016”  
26  
27 45 (NanoSTIMA), financed by the North Portugal Regional Operational Programme. NORTE  
28  
29 46 2020, under the PORTUGAL 2020 Partnership Agreement, and the European Regional  
30  
31 47 Development Fund (ERDF).  
32

### 33 **Correspondence:**

34 49 Dr. Luís Monteiro; Email: luismonteiro.net@gmail.com; Postal Address: Av. Infante D.  
35  
36 50 Henrique, 6200-506 Covilhã.  
37

38 51

### 40 **Contributions:**

41 52 LM had the original idea for the systematic review. LM, TM, and ISS wrote the protocol  
42  
43 53 and reviewed the search strategy. LM, TM, ISS, MM-S, and CM reviewed the protocol.  
44  
45  
46  
47  
48  
49  
50  
51  
52  
53  
54  
55  
56  
57  
58  
59  
60

## Abstract

*Introduction:* Life expectancy continues to increase in developed countries. Elderly people are more likely to consume more medications and become vulnerable to age-related changes in drugs' pharmacokinetics and pharmacodynamics. Recent studies have identified opportunities and barriers for deprescribing potentially inappropriate medications. It is already been demonstrated that computerized decision support systems can reduce physician orders for unnecessary tests. We will systematically review the available literature to understand if computerized decision support is effective in reducing the use of potentially inappropriate medications, thus having an impact on health outcomes.

*Methods and analysis:* A systematic review will be conducted using MEDLINE, CENTRAL, EMBASE and Web of Science databases, as well as the grey literature assessing the effectiveness of computer decision support interventions in deprescribing inappropriate medication, with an impact on health outcomes in the elderly. The search will be performed during January and February 2018. Two reviewers will conduct articles' screening, selection, and data extraction, independently and blind to each other. Eligible sources will be selected after discussing non-conformities. All extracted data, from the included articles, will be assessed based on studies' participants, design and setting, methodological quality, bias and any other potential sources of heterogeneity. This review will be conducted and reported in adherence with the PRISMA statement of quality for reporting systematic reviews and meta-analyses.

*Ethics and Dissemination:* As a systematic review, this research is exempt from ethical approval. We intend to publish the full article in a related peer-reviewed journal and present it at international conferences.

**Keywords:** Medical informatics applications, deprescriptions, potentially inappropriate medicines.

**Registration:** PROSPERO, nr. CRD42017067021.

## Strengths and limitations of this study



- 1  
2  
3 87 - We aim to clarify whether new technologies, namely computerized decision  
4 88 systems, can help reducing inappropriate medication in the elderly.  
5  
6 89 - This protocol was written following the recently published PRISMA-P guidelines.  
7  
8 90 - We will conduct a comprehensive systematic review on this clinical topic using, if  
9 possible, meta-analytic methods.  
10 91  
11 92 - Studies with high heterogeneity and varying quality may limit the quality of  
12 evidence for this systematic review.  
13 93  
14 94

## 95 **Introduction**

96  
97 In developed countries, aging population is increasing (1). Caring for older adults is a  
98 challenge for healthcare providers, as they are more likely to have multi-morbidities (2, 3)  
99 and to consume more medication (4).

100 Polypharmacy, defined as “the use of multiple drugs administered to the same patient, most  
101 commonly seen in elderly patients”(5, 6), although frequent has a negative impact on senior  
102 health (7, 8). There is an increased risk of drug interactions and prescriptions of potentially  
103 inappropriate medications (4), changes in pharmacokinetics and pharmacodynamics and  
104 limited generalization of clinical research results due to common exclusion of subjects with  
105 more than 65-years-old (9). So, prescribing medication for elderly patients should be  
106 evidence-based and particularly cautious.

107 In several cases it is urgent to deprescribe, this is to begin “the process of withdrawal of  
108 inappropriate medication, supervised by a health care professional with the goal of  
109 managing polypharmacy and improving outcomes” (10).

110 Inappropriate medication prescription, meaning “the practice of administering medications  
111 in a manner that poses more risk than benefit, particularly where safer alternatives exist” (5,  
112 11), can be reduced by several interventions (12). However, they are not widely known and  
113 therefore used. In one hand, general practitioners report interest in learning and using more  
114 mobile technologies to assist in clinical care (13); on the other they refer an insufficient  
115 emphasis on geriatric pharmacotherapy training (14).

116 It has already been shown that computerized decision support systems can reduce  
117 physicians’ orders of unnecessary tests (15). This systematic review aims to determine if

1  
2  
3 118 computerized decision support is effective in reducing potentially inappropriate medication  
4  
5 119 prescription in the elder population.

6 120 Other studies have addressed strategies to improve care of elderly in what concerns  
7  
8 121 inappropriate medication prescription (12, 16). In 2013, one synthesis study identified 8  
9  
10 122 randomized controlled trials (RCTs), 2 clusters RCTs and 2 controlled before and after  
11  
12 123 studies (9). In 2015, another study included 12 RCTs (13). Both studies reported high  
13  
14 124 heterogeneity on the included studies. However, these studies have not focused on  
15  
16 125 computerized decision support systems. In addition, we consider that since the last study  
17  
18 126 search, more adequate studies have been published and that, for the first time, a meta-  
19  
20 127 analysis will be possible to conduct.

21  
22 128

## 23 129 **Methods and Analysis**

24 130

### 25 131 *Eligibility criteria*

26 132 In this systematic review we will select 1) interventional studies, such as RCTs, non-  
27  
28 133 randomized controlled studies, and quasi-randomized controlled studies; 2) that include  
29  
30 134 participants with 65 years or more, to whom one or more regular medications were  
31  
32 135 prescribed and 3) assess the impact of computerized decision support systems in  
33  
34 136 withdrawal of potentially inappropriate medication prescription. On the other hand, studies  
35  
36 137 including only moribund, terminal, or palliative participants will be excluded. Studies  
37  
38 138 published or in press will be included independently of the language, year of publication,  
39  
40 139 and setting in which it was conducted (hospitals, nursing centres, communities, etc.).  
41  
42 140 Potentially inappropriate medications will be defined using the Beers Criteria (17) and  
43  
44 141 STOPP/START Criteria (18).

45 142

### 46 143 *Information sources*

47 144 Our sources of information will include electronic databases (namely MEDLINE,  
48  
49 145 CENTRAL, EMBASE, Web of Science), trial registries, different types of grey literature,  
50  
51 146 and contact with specialists in the field. If further data is needed, authors of the selected  
52  
53 147 articles will be contacted. The search will be performed in January and February 2018. The  
54  
55 148 search will have no language restrictions. In those cases that none of the research team

1  
2  
3 149 members is able to translate the included study, we will first contact the authors to ascertain  
4  
5 150 if the main data are available in other languages and seek to translate whenever necessary.  
6  
7 151 A second search, using all identified keywords and proprietary names of computerized  
8  
9 152 decision support systems will then be undertaken across all included databases.  
10

153

### 154 *Search strategy*

155 Our initial search syntax in CENTRAL will be: 1) MeSH descriptor: [Medical Informatics  
156 Applications] explode all trees; 2) Computer decision support; 3) MeSH descriptor:  
157 [Deprescriptions] explode all trees; 4) MeSH descriptor: [Inappropriate Prescribing]  
158 explode all trees; 5) #1 or #2; 6) #3 or #4; 7) #5 and #6.

159 For Pubmed, the query will be “(Medical Informatics Applications [MeSH Terms] OR  
160 (medical AND informatics AND applications)) AND ((Deprescriptions [Mesh Terms] OR  
161 deprescription OR deprescribing OR Inappropriate Prescribing [Mesh Terms] OR  
162 (inappropriate AND prescribing\*) OR (inappropriate AND prescription\*) OR (over\* AND  
163 prescribing\*)) OR medication errors [MeSH Terms] OR (error\* AND medication) OR  
164 (drug AND use AND error\*) AND (decision support systems, clinical [MeSH Terms] OR  
165 “clinical decision support systems” OR (clinical AND decision AND support\*) OR  
166 decision making, computer-assisted [MeSH Terms] OR (computer AND assisted AND  
167 decision AND making) OR (medical AND computer AND assisted AND decision AND  
168 making) OR medical order entry systems [MeSH Terms] OR (medical AND order entry  
169 systems) OR (medications AND alert AND systems) OR “computerized physician order  
170 entry systems” OR “computerized provider order entry systems” OR “computerized  
171 physician order entry” OR “computerized provider order entry”).

172 For Web of Science the query will be “TS=(“Medical Informatics Applications” OR  
173 (medical AND informatics AND applications)) AND TS=((Deprescriptions OR  
174 deprescription OR deprescribing OR “Inappropriate Prescribing” OR (inappropriate AND  
175 prescribing\*) OR (inappropriate AND prescription\*) OR (over\* AND prescribing\*)) OR  
176 “medication errors”OR (error\* AND medication) OR (drug AND use AND error\*) AND  
177 TS=(“clinical decision support systems” OR (clinical AND decision AND support\*) OR  
178 decision making, computer-assisted [MeSH Terms] OR (computer AND assisted AND  
179 decision AND making) OR (medical AND computer AND assisted AND decision AND

1  
2  
3 180 making) OR “medical order entry systems” OR (medical AND order entry systems) OR  
4  
5 181 (medications AND alert AND systems) OR “computerized physician order entry systems”  
6  
7 182 OR “computerized provider order entry systems” OR “computerized physician order  
8  
9 183 entry” OR “computerized provider order entry”).

10 184

### 11 185 *Study selection process*

12  
13 186 Two authors will independently, and blinded to each other, perform the primary article  
14  
15 187 screening. First, they will review the title and abstract, and categorise the articles into three  
16  
17 188 groups: relevant, irrelevant, and unsure. Articles categorised as irrelevant by both reviewers  
18  
19 189 will be eliminated from the study. Then, each reviewer will review the full text of the  
20  
21 190 remaining articles and make a list of those to be included. For both stages, the two lists will  
22  
23 191 be compared and disagreements will be discussed. When an agreement cannot be reached,  
24  
25 192 the whole team of researchers will come to the final decision.

26 193

### 27 194 *Data extraction and management*

28  
29 195 Once the articles to be included are selected, data will be extracted and entered into data  
30  
31 196 sheets independently by two reviewers. These two sheets, including their differences, will  
32  
33 197 be checked by a third reviewer.

34  
35 198 The following information will be extracted from each article: 1) study characteristics,  
36  
37 199 intervention type; type of study; country, setting, follow-up duration; 2) participants’  
38  
39 200 number and age; and 3) clinical outcomes. The primary outcome to be considered is the  
40  
41 201 effect of intervention on withdrawal of potentially inappropriate medications  
42  
43 202 (discontinuation rate). The authors will give priority to the following outcomes, by order of  
44  
45 203 importance: mortality, hospitalization, any reported adverse drug withdrawal effects, and  
46  
47 204 quality of life measurements.

48  
49 205 Any potential difference among reviewers will be discussed with the team, and if not  
50  
51 206 resolved, the manuscript authors will be contacted. Also, if required data are missing from  
52  
53 207 the article or are incomplete or unclear, inquiries will similarly be sent to the authors.

54 208

1  
2  
3 209 ***Risk of bias***

4 210 Two reviewers will assess, independently and blinded to each other, the risk of bias by  
5 211 applying the Cochrane Collaboration Risk of Bias tool to all the included studies (19).

6  
7 212

8  
9  
10 213 ***Data synthesis***

11 214 The final report will present the available data of the computer decision to support in  
12 215 reducing inappropriate medication prescription in older adults.

13 216 Each outcome will be combined and calculated using the statistical software RevMan 5.1  
14 217 (20), according to statistical guidelines referenced in the current version of the Cochrane  
15 218 Handbook for Systematic Reviews of Interventions (21).

16 219 If we are able to include a group of studies that are sufficiently comparable and reliable we  
17 220 will conduct a meta-analysis. We consider that we should use a random effect model taking  
18 221 in consideration the previous systematic reviews' results. We expect to encounter a  
19 222 sufficient number of studies, reporting a sufficient number of events, but that are not  
20 223 completely comparable (concerning the intervention, context and population).

21 224 If heterogeneity is severe ( $I^2$  superior to 40-50%) and studies' results are strongly biased,  
22 225 we will not perform a meta-analysis; thus, a narrative, qualitative summary will be done  
23 226 instead.

24 227 Effect sizes and 95% confidence intervals (CIs) will be expressed as odds ratios (OR).  
25 228 When a study reports zero events in both arms, we will consider using zero-cell correction  
26 229 methods.

27 230 Subgroup analyses will be used to explore possible sources of heterogeneity, based on the  
28 231 following: setting, type of software, medication and participants' clinical characteristics.

29 232 Regarding subgroups, we assume it will be relevant to include subgroups regarding the tool  
30 233 used by software to identify targets: STOPP/START criteria subgroup and the Beers  
31 234 criteria. We will also conduct meta-regression to evaluate whether the covariates have  
32 235 significant influence on heterogeneity.

33 236 Forest plots will be produced when three or more studies are included in a meta-analysis.

34 237 Data in tables will be presented by therapeutic class, based on the Anatomical Therapeutic  
35 238 Classification (ATC) codes.

239 Studies rated as having a high risk of bias will be included in the narrative synthesis but not  
240 on our meta-analysis and discussed in detail.

241 A systematic narrative synthesis will be provided in the text and tables to summarise and  
242 explain the characteristics and findings of the studies; it will explore the relationship within  
243 and between studies, in line with guidance from the Centre for Reviews and Dissemination.  
244 In order to determine whether publication bias is present, we will include funnel plot and  
245 statistical tests in the assessment, namely Begg's and Egger's test.

246 We will also ascertain if each RCT had their protocol published before recruitment of  
247 patients was initiated.

248 The quality of evidence for all outcomes will be judged with the Grading of  
249 Recommendations Assessment, and the Development and Evaluation working group  
250 methodology (22).

251 The final paper will be prepared following the Preferred Reporting Items for Systematic  
252 Reviews and Meta-Analyses (PRISMA) guidelines (23, 24).

253

## 254 **Ethics and Dissemination**

256 As a systematic review, this research is exempt from ethical approval. We intend to publish  
257 the full article in a related peer-reviewed journal and present it in international conferences.

258

## 259 **Discussion**

261 Although electronic health records are common in clinical practice, there is a lack of  
262 evidence of computer decision support systems regarding health outcomes. Deprescribing  
263 potentially inappropriate medication in the elderly is particularly difficult, although  
264 computer support may be an important tool. This systematic review will help identify the  
265 success of computerized decision support to reduce inappropriate medication prescription.  
266 Therefore, this review will be relevant for patients, health professionals, and policy makers.  
267 One potential limitation of this study will be if we find a limited number of studies with  
268 considerable differences regarding their characteristics and methodology. This may impair

1  
2  
3 269 our conclusions and impede meta-analysis. In addition, depending on the data available and  
4  
5 270 obtained results we may not be able to define which is the best decision support available.  
6

7 271

8  
9 272  
10  
11  
12  
13  
14  
15  
16  
17  
18  
19  
20  
21  
22  
23  
24  
25  
26  
27  
28  
29  
30  
31  
32  
33  
34  
35  
36  
37  
38  
39  
40  
41  
42  
43  
44  
45  
46  
47  
48  
49  
50  
51  
52  
53  
54  
55  
56  
57  
58  
59  
60

For peer review only

## References

1. OECD. Elderly population (indicator). doi: 10.1787/8d805ea1-en (Accessed on 26 February 2017) [Available from: <https://data.oecd.org/pop/elderly-population.htm#indicator-chart>].
2. Marengoni A, Angleman S, Melis R, Mangialasche F, Karp A, Garmen A, et al. Aging with multimorbidity: a systematic review of the literature. *Ageing research reviews*. 2011;10(4):430-9.
3. Prazeres F, Santiago L. Prevalence of multimorbidity in the adult population attending primary care in Portugal: a cross-sectional study. *BMJ open*. 2015;5(9):e009287.
4. Weng MC, Tsai CF, Sheu KL, Lee YT, Lee HC, Tzeng SL, et al. The impact of number of drugs prescribed on the risk of potentially inappropriate medication among outpatient older adults with chronic diseases. *QJM : monthly journal of the Association of Physicians*. 2013;106(11):1009-15.
5. Grosjean J, Merabti T, Dahamna B, Kergourlay I, Thirion B, Soualmia LF, et al. Health multi-terminology portal: a semantic added-value for patient safety. *Stud Health Technol Inform*. 2011;166:129-38.
6. HeTOP [Internet]. Rouen University Hospital. 2017 [cited (SCHEME=ISO8601)2011-03-17]. Available from: [http://www.hetop.eu/hetop/?la=en&q=#la=en&rr=MSH\\_D\\_019338&q=polypharmacy](http://www.hetop.eu/hetop/?la=en&q=#la=en&rr=MSH_D_019338&q=polypharmacy).
7. Fried TR, O'Leary J, Towle V, Goldstein MK, Trentalange M, Martin DK. Health outcomes associated with polypharmacy in community-dwelling older adults: a systematic review. *Journal of the American Geriatrics Society*. 2014;62(12):2261-72.
8. Lu WH, Wen YW, Chen LK, Hsiao FY. Effect of polypharmacy, potentially inappropriate medications and anticholinergic burden on clinical outcomes: a retrospective cohort study. *CMAJ : Canadian Medical Association journal = journal de l'Association medicale canadienne*. 2015;187(4):E130-7.
9. Van Spall HG, Toren A, Kiss A, Fowler RA. Eligibility criteria of randomized controlled trials published in high-impact general medical journals: a systematic sampling review. *Jama*. 2007;297(11):1233-40.
10. Reeve E, D. Gnjidic, J. Long, and S. Hilmer. A systematic review of the emerging definition of "deprescribing" with network analysis: Implications for future research and clinical practice. *British journal of clinical pharmacology*. 2015(2015a. 80(6)):1254-68
11. HeTOP. Inappropriate prescribing [Internet]. 2017 [cited (SCHEME=ISO8601)2011-03-17]. Available from: [http://www.hetop.eu/hetop/?la=en&q=&home#la=en&rr=MSH\\_D\\_057970&q=inappropriate+prescribing](http://www.hetop.eu/hetop/?la=en&q=&home#la=en&rr=MSH_D_057970&q=inappropriate+prescribing).
12. Patterson SM, Cadogan CA, Kerse N, Cardwell CR, Bradley MC, Ryan C. Interventions to improve the appropriate use of polypharmacy for older people. *Cochrane Database Syst Rev*. 2014;10.
13. survey PCISoW. PCI Survey: Family doctors want education on a smartphone2017. Available from: <https://www.dropbox.com/s/4vy5o2kdhz7ji8z/WONCA%20survey%20summary%20ACv2.pdf?dl=0>.



- 1  
2  
3 318 14. Cullinan S, Fleming A, O'Mahony D, Ryan C, O'Sullivan D, Gallagher P, et al.  
4 319 Doctors' perspectives on the barriers to appropriate prescribing in older hospitalized  
5 320 patients: a qualitative study. *British journal of clinical pharmacology*. 2014;79(5):860-9.  
6 321 15. Martins CMS, da Costa Teixeira AS, de Azevedo LFR, Sá LMB, Santos PAAP, do  
7 322 Couto MLGD, et al. The effect of a test ordering software intervention on the prescription  
8 323 of unnecessary laboratory tests - a randomized controlled trial. *BMC Medical Informatics  
9 324 and Decision Making*. 2017;17(1):20.  
10 325 16. Clyne B, Fitzgerald C, Quinlan A, Hardy C, Galvin R, Fahey T, et al. Interventions  
11 326 to Address Potentially Inappropriate Prescribing in Community-Dwelling Older Adults: A  
12 327 Systematic Review of Randomized Controlled Trials. *Journal of the American Geriatrics  
13 328 Society*. 2016;64(6):1210-22.  
14 329 17. American Geriatrics Society 2015 Updated Beers Criteria for Potentially  
15 330 Inappropriate Medication Use in Older Adults. *Journal of the American Geriatrics Society*.  
16 331 2015;63(11):2227-46.  
17 332 18. O'Mahony D, O'Sullivan D, Byrne S, O'Connor MN, Ryan C, Gallagher P.  
18 333 STOPP/START criteria for potentially inappropriate prescribing in older people: version 2.  
19 334 *Age and ageing*. 2014;44(2):213-8.  
20 335 19. Higgins JPT, Altman DG, Gøtzsche PC, Jüni P, Moher D, Oxman AD, et al. The  
21 336 Cochrane Collaboration's tool for assessing risk of bias in randomised trials. *BMJ*.  
22 337 2011;343.  
23 338 20. Review Manager (RevMan) Copenhagen: The Nordic Cochrane Centre, The  
24 339 Cochrane Collaboration. Version 5.3 ed2014.  
25 340 21. Cochrane Handbook for Systematic Reviews of Interventions Version 5.1.0:  
26 341 updated March 20112011.  
27 342 22. Alonso-Coello P, Schünemann HJ, Moberg J, Brignardello-Petersen R, Akl EA,  
28 343 Davoli M, et al. GRADE Evidence to Decision (EtD) frameworks: a systematic and  
29 344 transparent approach to making well informed healthcare choices. 1: Introduction. *BMJ*.  
30 345 2016;353.  
31 346 23. Moher D, Shamseer L, Clarke M, Ghersi D, Liberati A, Petticrew M, et al. Preferred  
32 347 reporting items for systematic review and meta-analysis protocols (PRISMA-P) 2015  
33 348 statement. *Systematic Reviews*. 2015;4(1):1.  
34 349 24. Shamseer L, Moher D, Clarke M, Ghersi D, Liberati A, Petticrew M, et al. Preferred  
35 350 reporting items for systematic review and meta-analysis protocols (PRISMA-P) 2015:  
36 351 elaboration & explanation. *BMJ*. 2015;349.  
37  
38  
39  
40  
41  
42 352  
43  
44  
45  
46  
47  
48  
49  
50  
51  
52  
53  
54  
55  
56  
57  
58  
59  
60

## PRISMA-P 2015 Checklist

This checklist has been adapted for use with protocol submissions to *Systematic Reviews* from Table 3 in Moher D et al: Preferred reporting items for systematic review and meta-analysis protocols (PRISMA-P) 2015 statement. *Systematic Reviews* 2015 4:1

| Section/topic                     | #  | Checklist item                                                                                                                                                                                  | Information reported                |                                     | Line number(s)     |
|-----------------------------------|----|-------------------------------------------------------------------------------------------------------------------------------------------------------------------------------------------------|-------------------------------------|-------------------------------------|--------------------|
|                                   |    |                                                                                                                                                                                                 | Yes                                 | No                                  |                    |
| <b>ADMINISTRATIVE INFORMATION</b> |    |                                                                                                                                                                                                 |                                     |                                     |                    |
| <b>Title</b>                      |    |                                                                                                                                                                                                 |                                     |                                     |                    |
| Identification                    | 1a | Identify the report as a protocol of a systematic review                                                                                                                                        | <input checked="" type="checkbox"/> | <input type="checkbox"/>            | 2,3                |
| Update                            | 1b | If the protocol is for an update of a previous systematic review, identify as such                                                                                                              | <input type="checkbox"/>            | <input checked="" type="checkbox"/> | N/A                |
| <b>Registration</b>               | 2  | If registered, provide the name of the registry (e.g., PROSPERO) and registration number in the Abstract                                                                                        | <input checked="" type="checkbox"/> | <input type="checkbox"/>            | 5; 81              |
| <b>Authors</b>                    |    |                                                                                                                                                                                                 |                                     |                                     |                    |
| Contact                           | 3a | Provide name, institutional affiliation, and e-mail address of all protocol authors; provide physical mailing address of corresponding author                                                   | <input checked="" type="checkbox"/> | <input type="checkbox"/>            | 8-25               |
| Contributions                     | 3b | Describe contributions of protocol authors and identify the guarantor of the review                                                                                                             | <input checked="" type="checkbox"/> | <input type="checkbox"/>            | 50-52              |
| <b>Amendments</b>                 | 4  | If the protocol represents an amendment of a previously completed or published protocol, identify as such and list changes; otherwise, state plan for documenting important protocol amendments | <input type="checkbox"/>            | <input checked="" type="checkbox"/> | N/A                |
| <b>Support</b>                    |    |                                                                                                                                                                                                 |                                     |                                     |                    |
| Sources                           | 5a | Indicate sources of financial or other support for the review                                                                                                                                   | <input checked="" type="checkbox"/> | <input type="checkbox"/>            | 39-46              |
| Sponsor                           | 5b | Provide name for the review funder and/or sponsor                                                                                                                                               | <input checked="" type="checkbox"/> | <input type="checkbox"/>            | 39                 |
| Role of sponsor/funder            | 5c | Describe roles of funder(s), sponsor(s), and/or institution(s), if any, in developing the protocol                                                                                              | <input type="checkbox"/>            | <input checked="" type="checkbox"/> | N/A                |
| <b>INTRODUCTION</b>               |    |                                                                                                                                                                                                 |                                     |                                     |                    |
| <b>Rationale</b>                  | 6  | Describe the rationale for the review in the context of what is already known                                                                                                                   | <input checked="" type="checkbox"/> | <input type="checkbox"/>            | 92-113             |
| <b>Objectives</b>                 | 7  | Provide an explicit statement of the question(s) the review will address with reference to participants, interventions, comparators, and outcomes (PICO)                                        | <input checked="" type="checkbox"/> | <input type="checkbox"/>            | 117-127<br>187-188 |

| Section/topic                      | #   | Checklist item                                                                                                                                                                                                                              | Information reported                |                          | Line number(s)     |
|------------------------------------|-----|---------------------------------------------------------------------------------------------------------------------------------------------------------------------------------------------------------------------------------------------|-------------------------------------|--------------------------|--------------------|
|                                    |     |                                                                                                                                                                                                                                             | Yes                                 | No                       |                    |
| <b>METHODS</b>                     |     |                                                                                                                                                                                                                                             |                                     |                          |                    |
| Eligibility criteria               | 8   | Specify the study characteristics (e.g., PICO, study design, setting, time frame) and report characteristics (e.g., years considered, language, publication status) to be used as criteria for eligibility for the review                   | <input checked="" type="checkbox"/> | <input type="checkbox"/> | 124-127            |
| Information sources                | 9   | Describe all intended information sources (e.g., electronic databases, contact with study authors, trial registers, or other grey literature sources) with planned dates of coverage                                                        | <input checked="" type="checkbox"/> | <input type="checkbox"/> | 138-161            |
| Search strategy                    | 10  | Present draft of search strategy to be used for at least one electronic database, including planned limits, such that it could be repeated                                                                                                  | <input checked="" type="checkbox"/> | <input type="checkbox"/> | 138-161            |
| <b>STUDY RECORDS</b>               |     |                                                                                                                                                                                                                                             |                                     |                          |                    |
| Data management                    | 11a | Describe the mechanism(s) that will be used to manage records and data throughout the review                                                                                                                                                | <input checked="" type="checkbox"/> | <input type="checkbox"/> | 172-180            |
| Selection process                  | 11b | State the process that will be used for selecting studies (e.g., two independent reviewers) through each phase of the review (i.e., screening, eligibility, and inclusion in meta-analysis)                                                 | <input checked="" type="checkbox"/> | <input type="checkbox"/> | 163-170            |
| Data collection process            | 11c | Describe planned method of extracting data from reports (e.g., piloting forms, done independently, in duplicate), any processes for obtaining and confirming data from investigators                                                        | <input checked="" type="checkbox"/> | <input type="checkbox"/> | 191-192            |
| Data items                         | 12  | List and define all variables for which data will be sought (e.g., PICO items, funding sources), any pre-planned data assumptions and simplifications                                                                                       | <input checked="" type="checkbox"/> | <input type="checkbox"/> | 183-188            |
| Outcomes and prioritization        | 13  | List and define all outcomes for which data will be sought, including prioritization of main and additional outcomes, with rationale                                                                                                        | <input checked="" type="checkbox"/> | <input type="checkbox"/> | 186-188            |
| Risk of bias in individual studies | 14  | Describe anticipated methods for assessing risk of bias of individual studies, including whether this will be done at the outcome or study level, or both; state how this information will be used in data synthesis                        | <input checked="" type="checkbox"/> | <input type="checkbox"/> | 191-192<br>210-211 |
| <b>DATA</b>                        |     |                                                                                                                                                                                                                                             |                                     |                          |                    |
| Synthesis                          | 15a | Describe criteria under which study data will be quantitatively synthesized                                                                                                                                                                 | <input checked="" type="checkbox"/> | <input type="checkbox"/> | 195-229            |
|                                    | 15b | If data are appropriate for quantitative synthesis, describe planned summary measures, methods of handling data, and methods of combining data from studies, including any planned exploration of consistency (e.g., $I^2$ , Kendall's tau) | <input checked="" type="checkbox"/> | <input type="checkbox"/> | 195-229<br>199-200 |
|                                    | 15c | Describe any proposed additional analyses (e.g., sensitivity or subgroup analyses, meta-regression)                                                                                                                                         | <input checked="" type="checkbox"/> | <input type="checkbox"/> | 204-205<br>208-209 |

| Section/topic                            | #   | Checklist item                                                                                                              | Information reported                |                          | Line number(s) |
|------------------------------------------|-----|-----------------------------------------------------------------------------------------------------------------------------|-------------------------------------|--------------------------|----------------|
|                                          |     |                                                                                                                             | Yes                                 | No                       |                |
|                                          | 15d | If quantitative synthesis is not appropriate, describe the type of summary planned                                          | <input checked="" type="checkbox"/> | <input type="checkbox"/> | 212-214        |
| <b>Meta-bias(es)</b>                     | 16  | Specify any planned assessment of meta-bias(es) (e.g., publication bias across studies, selective reporting within studies) | <input checked="" type="checkbox"/> | <input type="checkbox"/> | 215-216        |
| <b>Confidence in cumulative evidence</b> | 17  | Describe how the strength of the body of evidence will be assessed (e.g., GRADE)                                            | <input checked="" type="checkbox"/> | <input type="checkbox"/> | 219-221        |

For peer review only
